# Genome Wide Association for Addiction: Replicated Results and Comparisons of Two Analytic Approaches

Tomas Drgon, Ping-Wu Zhang, Catherine Johnson, Donna Walther, Judith Hess, Michelle Nino, George R. Uhl\*

Molecular Neurobiology Branch, National Institutes of Health Intramural Research Program, National Institute on Drug Abuse, Baltimore, Maryland, United States of America

## Abstract

**Background:** Vulnerabilities to dependence on addictive substances are substantially heritable complex disorders whose underlying genetic architecture is likely to be polygenic, with modest contributions from variants in many individual genes. “Nontemplate” genome wide association (GWA) approaches can identify groups of chromosomal regions and genes that, taken together, are much more likely to contain allelic variants that alter vulnerability to substance dependence than expected by chance.

**Methodology/Principal Findings:** We report pooled “nontemplate” genome-wide association studies of two independent samples of substance dependent vs control research volunteers (n = 1620), one European-American and the other African-American using 1 million SNP (single nucleotide polymorphism) Affymetrix genotyping arrays. We assess convergence between results from these two samples using two related methods that seek clustering of nominally-positive results and assess significance levels with Monte Carlo and permutation approaches. Both “converge then cluster” and “cluster then converge” analyses document convergence between the results obtained from these two independent datasets in ways that are virtually never found by chance. The genes identified in this fashion are also identified by individually-genotyped dbGAP data that compare allele frequencies in cocaine dependent vs control individuals.

**Conclusions/Significance:** These overlapping results identify small chromosomal regions that are also identified by genome wide data from studies of other relevant samples to extents much greater than chance. These chromosomal regions contain more genes related to “cell adhesion” processes than expected by chance. They also contain a number of genes that encode potential targets for anti-addiction pharmacotherapeutics. “Nontemplate” GWA approaches that seek chromosomal regions in which nominally-positive associations are found in multiple independent samples are likely to complement classical, “template” GWA approaches in which “genome wide” levels of significance are sought for SNP data from single case vs control comparisons.

**Citation:** Drgon T, Zhang P-W, Johnson C, Walther D, Hess J, et al. (2010) Genome Wide Association for Addiction: Replicated Results and Comparisons of Two Analytic Approaches. PLoS ONE 5(1): e8832. doi:10.1371/journal.pone.008832

**Editor:** Katharina Domschke, University of Muenster, Germany

**Received:** July 13, 2009; **Accepted:** December 21, 2009; **Published:** January 21, 2010

This is an open-access article distributed under the terms of the Creative Commons Public Domain declaration which stipulates that, once placed in the public domain, this work may be freely reproduced, distributed, transmitted, modified, built upon, or otherwise used by anyone for any lawful purpose.

**Funding:** This study was fully supported by the National Institutes of Health (NIH) Intramural Research Program (National Institute on Drug Abuse). The funders had no role in study design, data collection and analysis, decision to publish, or preparation of the manuscript. This research was supported financially by the NIH Intramural Research Program, National Institute on Drug Abuse, Department of Health and Human Services. Support for dbGAP data came from the NIH Genes, Environment and Health Initiative (GEI) (U01 HG004422)/Gene Environment Association Studies (GENEVA) which received assistance with phenotype harmonization, genotype cleaning, and study coordination from the GENEVA Coordinating Center (U01 HG004446), assistance with data cleaning from the National Center for Biotechnology Information, and assistance with collection of datasets and samples by the Collaborative Study on the Genetics of Alcoholism (COGA; U10 AA008401), the Collaborative Genetic Study of Nicotine Dependence (COGEND; P01 CA089392) and the Family Study of Cocaine Dependence (FSCD; R01 DA013423). Support for genotyping dbGAP samples at the Johns Hopkins University Center for Inherited Disease Research came through (U01HG004438), the National Institute on Alcohol Abuse and Alcoholism, the National Institute on Drug Abuse and the NIH contract “High throughput genotyping for studying the genetic contributions to human disease” (HHSN268200782096C). dbGaP datasets were obtained at [http://www.ncbi.nlm.nih.gov/projects/gap/cgi-bin/study.cgi?study\\_id=phs000092.v1.p1](http://www.ncbi.nlm.nih.gov/projects/gap/cgi-bin/study.cgi?study_id=phs000092.v1.p1) through dbGaP accession number phs000092.v1.p.

**Competing Interests:** The authors have declared that no competing interests exist.

\* E-mail: [guhl@intra.nida.nih.gov](mailto:guhl@intra.nida.nih.gov)

## Introduction

Vulnerability to addictions is a complex trait with substantial genetic influences that are documented by data from family, adoption and twin studies [1–4]. Twin studies also document shared heritable influences on vulnerability to dependence on addictive substances from different pharmacological classes (*eg* nicotine and stimulants) [2,3,5]. In individuals from most populations, each gene’s variants are likely to contribute modestly to substance dependence vulnerability. Contributions of nicotinic

receptor gene variants to individual differences in smoking quantity [6–10] and acetaldehyde dehydrogenase/alcohol dehydrogenase variants to risk for alcohol dependence in Asians may provide larger effects of variants at single loci [11,12]. However, combined data from linkage and initial genome wide association studies (GWA) [6,13–17] suggest that most genetic effects on vulnerability to substance dependence are likely to be polygenic.

GWA is a method of choice for identifying genes whose variants influence vulnerability to complex disorders. GWA approaches that we term “template” seek to identify “genome wide” levels of

significance ( $ca\ 10^{-7}$ – $10^{-8}$ ) for case *vs* control differences in single samples of individually genotyped individuals. “Replication” of GWA results in these “template” GWA analyses is based on identification of genome wide significance for the same SNP with the same phase of association in each of multiple independent samples.

However, with underlying polygenic genetic architectures, effects of only modest magnitude are likely to be identified in many single samples of practical size. We and others have developed “nontemplate” GWA analyses to address highly heritable complex phenotypes for which there is little evidence for many genes of major effect. These analyses have focused on identification of nominally significant case *vs* control allele frequency differences at several nearby SNP markers in multiple independent samples. Identifying “clustered” positive findings at several nearby SNPs and finding clustered positive results in several independent samples provide some of the best available controls for technical errors and for the large numbers of repeated comparisons that are fundamental to GWA. There is no consensus concerning criteria for declaring “replication” of GWA results in the absence of genome wide significance for the same SNP with the same phase of association in multiple independent samples [18–23]. Several considerations have prompted differing approaches to 1) combining and comparing GWA datasets and 2) declaring that association between sets of nearby SNPs and a complex disorder is “replicated” in the absence of genome wide significance for any result. Underlying functional haplotypes contributing to disease vulnerability may be tagged differently by different SNP sets in different samples. Allelic heterogeneity can result in 1) contributions of different variants within the same gene and 2) differences in the predominant variants in a gene that influence the phenotype in different samples. Meta-analyses often combine data from studies that have examined alleles of different sets of SNPs.

We now report “nontemplate” GWA [24] studies that compare allele frequencies for almost 870,000 autosomal SNPs in each of two independent samples (one European-American and the second African-American) of controls *vs* polysubstance abusers who report heavy use and dependence on at least one illegal substance. We have characterized and collected these case and control samples at a single site. We use a nontemplate GWA approach with DNA pooling to study the genetics of this illegal behavior. We analyze genes that are identified by “replicated” results from these data in each of two ways that appear to complement each other (though they are not independent of each other): 1) “converge then cluster”, based on identification of SNPs within a gene that a) display nominally significant case *vs* control allele frequency differences in each of these two samples and b) lie near other SNPs with the same properties, and 2) “cluster then converge”, based on SNPs within genes that are identified in each of the two samples by clusters of SNPs that a) display nominally significant case *vs* control allele frequency differences and b) lie near other SNPs with the same properties. Since approach (2) does not require that the identical SNPs display nominally significant results in each of several samples, it is especially useful for evaluating concordance between GWA datasets that use different sets of SNPs. We can thus apply this approach to examining the concordance between addiction and co-occurring traits likely to display complex genetic influences [25] using empirical Monte Carlo statistics to assess the significance of results. We discuss this work in light of its technical and analytic limitations and in its similarities and differences with “template” GWA analyses that seek associations that display genome-wide significance, typically in phenotypes that display oligogenic genetic architectures and/or in larger samples that are often recruited in multiple locations. We also describe the ways in which these pooled

genotype data identify a number of the same genomic regions that are identified by recently available dbGAP datasets that provide individual genotyping for cocaine-dependent and nondependent comparison groups.

## Results

### Variation and Power Calculations

The pooling approach used herein provides evidence for good assessment of allele frequency differences and variation in these estimates. SNP allele frequency assessments made herein display modest variability and good fits between individual and pooled genotyping with mean correlation of  $0.98 \pm 0.002$  (standard error, SEM, Fig. 1). Validating studies with similar arrays add to confidence in this data [13,14,26–34]. SEM for the variation among three replicate studies of each DNA pool was  $\pm 0.03$ . SEM for the variation between the *ca.* 20 pools studied for each ethnicity/phenotype group was  $\pm 0.02$ . These estimates of variability allowed us to estimate 0.8 and 0.9 power to detect 5 and 10% allele frequency differences in the African American sample sizes described here. We had 0.76 and 0.99 power to detect 5 and 10% allele frequency differences in European American samples. Corresponding false negative probabilities for approach 1 (*converge then cluster*) are thus 0.39 and 0.11, since this approach requires nominally positive results for the same SNP from both samples. Statistical power for the analysis of these samples can also be calculated using “gene detective” [25]; this power rises from 0.1 to

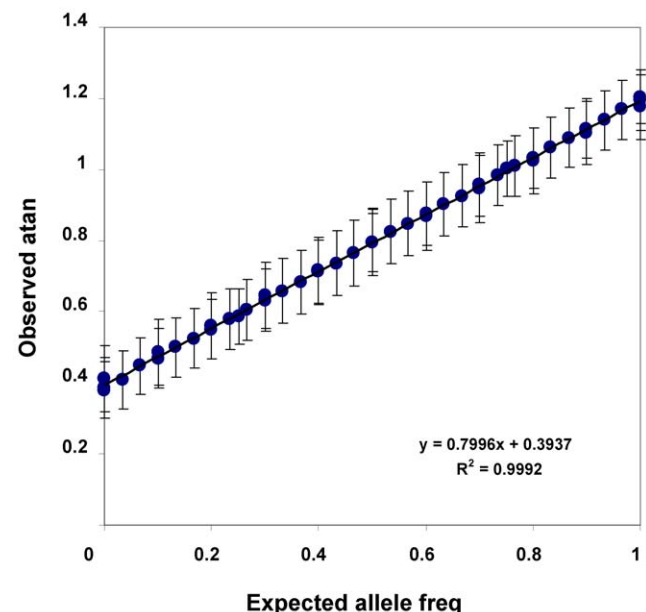

**Figure 1. Validation graph of the relationships between observed (y axis) and expected (x axis) allele frequency data for Affymetrix 6.0 arrays.** “Expected” frequencies come from individual genotyping of individuals. These individuals were assigned to three sets of pools each containing 2, 5 and 15 CEPH individuals (total of 81 individuals). Arctan A/B represent the “observed” measures of allele frequency and are arctangents of the A/B hybridization ratios for this set of pools of individuals. In this figure we have only used SNPs that show at least 10% difference in the expected values across the set of pools (total of 146,000 SNPs). We have obtained similar data from studies validating 500k, 100k, 10k and HuSNP arrays [14–16]. Note that DNA used for hybridization is less than that recommended for individual genotyping (135 vs 225 ng) in order to avoid saturation of hybridization signals for some array features. Error bars indicate SEM. doi:10.1371/journal.pone.0008832.g001

ca. 0.9 as risk to a sib of an affected individual ( $\lambda_s$ ) rises from 1.2 to 2.5 [35].

### “Converge Then Cluster”

In our assessment of allele frequency differences between abusers and controls 83,202 and 75,327 SNPs displayed “nominally positive” t values with  $p < 0.05$  in African- and European-American samples, respectively. There was substantial convergence of the results from these two GWA datasets using the non-template (1) “converge then cluster” GWA analysis approach. 11,037 of the 870,000 tested SNPs displayed “reproducible” results, as defined using this approach. These SNPs thus displayed nominally significant abuser vs control allele frequency differences in each of the two samples. This overall convergence was much greater than anticipated based on chance. None of 100,000 Monte Carlo simulation trials that each began by selecting 83,202 and 75,327 random SNPs displayed as many as 11,037 nominally significant results in both samples ( $p < 0.00001$ ). None of 10,000 permutation trials displayed results from permuted datasets that

matched or exceeded the 11,037 SNPs actually observed ( $p < 0.0001$  by permutation analyses). These 11,037 SNPs thus provide the “reproducibly positive SNPs” for analytic approach (1).

The reproducibly-positive SNPs identified by abuser/control comparisons in both European- and African-American samples cluster together in small chromosomal regions (Fig. 2) to extents much greater than anticipated by chance. 937 of the reproducibly-positive SNPs from approach (1) lie in 271 clusters of  $\geq 3$  SNPs that are separated from each other by  $\leq 25$  kb. This degree of clustering was never identified by chance (Monte Carlo  $p < 0.00001$ ). These clusters of reproducibly positive SNPs from analytic approach (1) identify 104 genes (Tables 1, 2). Randomly selected SNPs never cluster by chance within genes to the extent observed here (Monte Carlo  $p < 0.00001$ ).

We would anticipate the observed, highly significant clustering of SNPs that display nominally positive results if many of these reproducibly positive SNPs lay near and were in linkage disequilibrium with functional allelic variants that distinguished substance dependent subjects from control subjects, but not if they

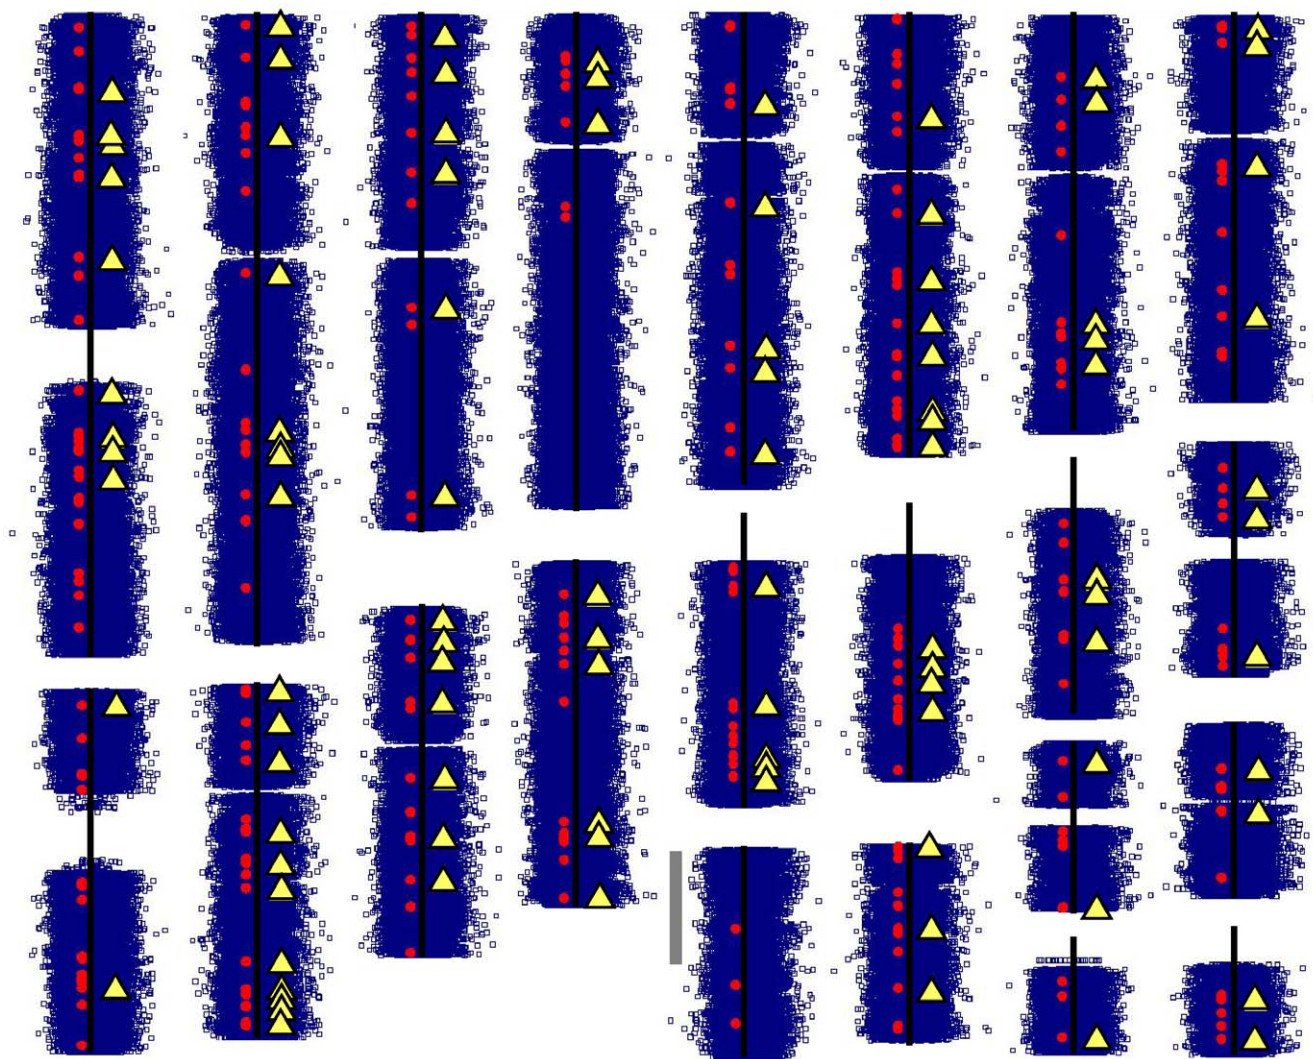

**Figure 2. Chromosomal distributions of abuser/control t values, clustered positive SNPs, and candidate positive genes (Table 1).** Blue boxes: t values of the abuser control differences from 870,000 SNPs studied here. Values from European-Americans: right side, from African-Americans: left side. Red circles: Positions of the SNPs whose data yield clustered positive values. Yellow triangles: positions of clustered positive results that support genes listed in Table 1. Scale bar (grey): 25 Mb. doi:10.1371/journal.pone.0008832.g002

**Table 1.** Results of “converge first then cluster” (approach 1) and “cluster first then converge (approach 2) analytic strategies applied to substance dependence vulnerability datasets described herein.

| #SNPs                                   | Clustered SNPs |               |               | Number of genes | Overlap with 104 genes |           |
|-----------------------------------------|----------------|---------------|---------------|-----------------|------------------------|-----------|
|                                         | clust          | dist          | converg       |                 |                        |           |
| <b>CONVERGE FIRST, THEN CLUSTER (1)</b> |                |               |               |                 |                        |           |
| <b>3</b>                                | <b>25,000</b>  |               | <b>937</b>    | <b>104</b>      | <b>104</b>             |           |
| 3                                       | 10,000         |               | 299           | 37              | 37                     |           |
| 4                                       | 25,000         |               | 328           | 31              | 31                     |           |
| 4                                       | 10,000         |               | 86            | 10              | 10                     |           |
| <b>CLUSTER FIRST, THEN CONVERGE (2)</b> |                |               |               |                 |                        |           |
| 3                                       | 25,000         | 55,507        | 47,614        | 18,552          | 1,546                  | 104       |
| 3                                       | 10,000         | 29,009        | 25,523        | 5,353           | 802                    | 79        |
| 4                                       | 25,000         | 44,881        | 37,927        | 12,562          | 1,015                  | 92        |
| <b>4</b>                                | <b>10,000</b>  | <b>17,849</b> | <b>15,779</b> | <b>2,142</b>    | <b>341</b>             | <b>52</b> |

Columns list the numbers of SNPs that display abuser vs control differences with nominal  $p < 0.05$  (nominally positive) and lie in clusters, the maximal distance between nominally positive SNPs that is considered to indicate clustering, the numbers of clustered, nominally positive SNPs in African American samples, the numbers of clustered, nominally positive SNPs in European American samples, the numbers of “convergent” SNPs that display nominally positive results in both samples, the fraction of “convergent” SNPs that are likely to be true positives, on average, based on comparison with randomly chosen SNPs that are selected for similar convergence analyses (data not shown), the numbers of genes identified by the clusters of nominally positive SNPs and the overlap between the genes in each set and the 104 genes identified by the preplanned criteria used for primary analysis, using approach 1 with 3 SNP and 25kb intervals (*boldfaced*). The primary comparison set from approach (2) is also listed in boldface, based on the similar fraction of true positives anticipated using these criteria. We summarize these data in Fig. 2. doi:10.1371/journal.pone.0008832.t001

represented chance observations. The Monte Carlo  $p$  values noted here are likely to receive contributions from both the extent of linkage disequilibrium among the clustered, nominally positive SNPs and the extent of linkage disequilibrium between these SNPs and the functional haplotype(s) that lead to the association with substance dependence.

### “Cluster Then Converge”

Non-template analytic approach (2) “cluster then converge” also assessed the significance of the 83,202 and 75,327 SNPs that displayed nominally positive results in African-American and European-American samples, respectively. 17,849 SNPs from African American and 15,779 SNPs from European American samples provide clusters, within each sample, of at least 4 nominally positive SNPs that lie within  $\leq 10$ kb of each other. 2,142 of these SNPs lie within clusters that identify the same genes in both African- and European-American samples (Tables 1, 2). The 341 genes that are identified in this way (Table S1) are never identified by chance, using this approach, in 100,000 Monte Carlo II simulation trials ( $p < 0.00001$ ) [36] and Materials and Methods). The genes identified using approach (2) overlap with  $\frac{1}{2}$  of the genes identified using approach (1) (Table 2).

### Controls for Alternative Hypotheses

Controls for occult stratification do not appear to provide convincing alternative explanations for the data obtained here. Only 22 of the 937 clustered, reproducibly positive SNPs that we

identify here using approach (1) also display sizable allele frequency differences based on ethnicity. Since we would have expected 24 by chance, it appears highly unlikely that stratification based on racial/ethnic differences between each abuser and corresponding control samples provides a major basis for the addiction-associated allelic variants identified herein. Principal components analyses identify robust principal components that cleanly separate African-American from European-American samples and account for about 94% of the variance when both samples are analyzed together (*data not shown*). However, there is significant distinction between substance dependent vs control pools based on additional principal components that are orthogonal to those that distinguish individuals with African vs European heritages. Analyses of the likelihood that substance dependent samples would be distinguished from control samples by this principal component based on chance yield  $p = 0.00003$  and  $p = 0.057$  probabilities in European- and African-American samples, respectively (*data not shown*).

Assay noise also fails to provide a convincing alternative explanation for the data reported herein. When we examined the overlap between the clustered positive SNPs and the 10% of the SNPs for which the correlations between observed and expected values in validating studies were poorest, we found about as many (15) as we would have expected to find by chance (13). The  $t$  tests used for assignment of primary nominal significance also correct for assay variability. There is thus no indication that assay noise provides the sole basis for the addiction-associated allelic variants identified herein.

### Overlap between Genes Identified Here and Those Identified by Other Previously Reported GWA Datasets

The genes identified using approaches (1) or (2) each overlap with genes identified in several other GWA datasets for substance dependence, based on Monte Carlo simulations ([36] and Materials and Methods). There are significant overlaps with data from: a) 600k GWA studies of a subset of these polysubstance abusers ( $p < 0.001$ ) [16], b) 500–600k GWA data from studies of methamphetamine dependent Japanese samples [17] ( $p = 0.04$ ), c) 100k GWA data from studies of alcohol dependence in European-Americans [15] ( $p = 0.0003$ ) and d) 38k data from comparisons between more frequently nicotine dependent vs less frequently nicotine dependent groups of smokers [37,38] ( $p = 0.02$ ). We also identify substantial overlap with individually genotyped data from dbGAP samples of cocaine dependent vs control individuals (Table 2). This overlap is even more impressive when we compare the genomic regions identified by clustered, nominally significant results from samples of the same racial/ethnic group (Drgon et al, in preparation).

### Preferential Brain Expression of Genes Identified Here

We evaluated evidence for preferential brain and brain regional expression patterns of the 104 genes identified in Table 2. Brain libraries contained at least two expressed sequence tags (ESTs) that corresponded to 79% (82/104) of the genes in Table 2. These ESTs came from amygdala (255), adult brain (736), developing brain (1243), caudate (striatum) (63), cerebellum (375), cerebral cortex (52), hippocampus (554), hypothalamus (274), medulla oblongata (31), substantia nigra (43), subthalamic nucleus (38), thalamus (187), corpus callosum or other white matter (72) and peripheral nerve (97). Levels of expression for this set of genes (compared to all genes) displayed nominal significance in thalamus, hippocampus, amygdala, cerebellum, substantia nigra, hypothalamus and whole brain ( $p = 0.002, 0.003, 0.004, 0.005, 0.02, 0.03$  and  $0.02$ , respectively). After Bonferroni corrections,

**Table 2.** Genes and classes of genes that contain clustered positive SNPs using the principal, preplanned analyses with criteria noted in Table 1.

| class/gene                           | chr | kbp    | gene description             | 1: converge then cluster |       | 2: cluster then converge |       | dbGAP support |
|--------------------------------------|-----|--------|------------------------------|--------------------------|-------|--------------------------|-------|---------------|
|                                      |     |        |                              | #SNPs                    | p     | #SNPs AA/EA              | p     | # SNPs AA/EA  |
| <i>cell adhesion related</i>         |     |        |                              |                          |       |                          |       |               |
| CDCP1                                | 3   | 45098  | CUB dom cont prot 1          | 3                        | 0.021 |                          |       |               |
| FHIT*                                | 3   | 59710  | fragile histid triad         | 5                        | 0.022 | 29/62                    | 0.003 | 38/24         |
| ODZ2                                 | 5   | 166644 | odd Oz/ten-m hom 2           | 3                        | 0.091 | 21/23                    | 0.011 | 4/0           |
| CSMD1*                               | 8   | 2782   | CUB Sushi mult dom 1         | 10                       | 0.004 | 117/137                  | 0.001 | 84/55         |
| CSMD3                                | 8   | 113304 | CUB Sushi mult dom 3         | 4                        | 0.033 |                          |       | 4/5           |
| CD274                                | 9   | 5440   | CD274 molecule               | 5                        | 0.002 | 7/6                      | 0.013 |               |
| PCDH15                               | 10  | 55250  | protocadherin 15             | 3                        | 0.094 |                          |       |               |
| CTNNA3*                              | 10  | 67349  | $\alpha$ 3 catenin           | 3                        | 0.158 | 29/6                     | 0.059 | 0/20          |
| NRXN3                                | 14  | 77939  | neurexin 3                   | 3                        | 0.134 | 18/5                     | 0.110 | 4/0           |
| SEMA6D                               | 15  | 45797  | semaphorin 6D                | 7                        | 0.001 | 14/7                     | 0.005 |               |
| THSD4                                | 15  | 69220  | thrombospondin I dom 4       | 3                        | 0.067 |                          |       |               |
| CDH13*                               | 16  | 81218  | cadherin 13                  | 3                        | 0.104 | 76/65                    | 0.001 | 0/5           |
| DSCAM*                               | 21  | 40306  | Down synd cell adh mol       | 4                        | 0.026 | 23/36                    | 0.003 | 8/0           |
| <i>DNA/RNA handling</i>              |     |        |                              |                          |       |                          |       |               |
| CHD1L                                | 1   | 145180 | chrdom h'case DNA bind1L     | 3                        | 0.018 |                          |       | 5/0           |
| DDX1                                 | 2   | 15649  | DEAD box polypept 1          | 3                        | 0.019 |                          |       |               |
| PRPF4                                | 9   | 115077 | pre-mRNA proc fact 4 hom     | 3                        | 0.012 |                          |       |               |
| PIWIL1                               | 12  | 129388 | piwi-like 1                  | 3                        | 0.019 |                          |       |               |
| POLR1D                               | 13  | 27094  | RNA pol I polypep D          | 3                        | 0.019 |                          |       |               |
| SAMD4A                               | 14  | 54104  | ster a motif dom 4A          | 3                        | 0.035 |                          |       |               |
| RAD51L1                              | 14  | 67356  | RAD51-like 1                 | 3                        | 0.073 | 4/10                     | 0.112 | 0/8           |
| <i>enzyme</i>                        |     |        |                              |                          |       |                          |       |               |
| MKNK1                                | 1   | 46795  | MAP kin interact S/T kin 1   | 3                        | 0.019 |                          |       |               |
| AGBL4                                | 1   | 48822  | ATP/GTP binding protL 4      | 6                        | 0.008 | 10/8                     | 0.040 | 7/0           |
| NME7                                 | 1   | 167368 | nucleoside-diP kin           | 14                       | 0.001 | 22/25                    | 0.001 | 0/8           |
| QSOX1                                | 1   | 178390 | quiescin Q6 SH ox'ase 1      | 3                        | 0.019 |                          |       | 7/0           |
| PRKCE                                | 2   | 45732  | protein kinase C epsilon     | 3                        | 0.059 | 13/22                    | 0.002 | 12/0          |
| LASS6                                | 2   | 169021 | ceramide synthase 6          | 3                        | 0.042 |                          |       |               |
| TMPRSS7                              | 3   | 113236 | serine TM protease 7         | 3                        | 0.018 |                          |       |               |
| EHHADH                               | 3   | 186391 | 3-OHAc coA dehydrog'ase      | 3                        | 0.022 |                          |       | 4/4           |
| GBA3                                 | 4   | 22303  | acidic $\beta$ glucosidase 3 | 6                        | 0.003 | 5/5                      | 0.042 |               |
| PDE1C*                               | 7   | 31795  | calmod-dep P-diest'ase 1C    | 3                        | 0.039 |                          |       |               |
| MSRA                                 | 8   | 9949   | methionine SO red'ase A      | 3                        | 0.047 |                          |       |               |
| ADARB2                               | 10  | 1218   | RNA-spec A deam'ase B2       | 3                        | 0.061 |                          |       | 5/9           |
| SLK                                  | 10  | 105717 | STE20-like kinase            | 3                        | 0.019 |                          |       |               |
| PRKCH                                | 14  | 60858  | protein kinase C eta         | 5                        | 0.008 |                          |       |               |
| XYLT1                                | 16  | 17108  | xylosyltransferase I         | 3                        | 0.048 | 4/11                     | 0.043 | 0/4           |
| <i>ligand</i>                        |     |        |                              |                          |       |                          |       |               |
| CXCL14                               | 5   | 134934 | chemokine ligand 14          | 4                        | 0.005 | 5/5                      | 0.020 |               |
| <i>protein handling/modification</i> |     |        |                              |                          |       |                          |       |               |
| TSSC1                                | 2   | 3171   | tumor sup subtrans cand 1    | 4                        | 0.009 | 6/6                      | 0.034 |               |
| FKBP15                               | 9   | 114967 | FK506 binding protein 15     | 4                        | 0.006 |                          |       |               |
| HSPA12A                              | 10  | 118419 | HSP 12A                      | 3                        | 0.020 | 10/15                    | 0.004 |               |
| BRWD2                                | 10  | 122600 | bromodom WD dom 2            | 3                        | 0.022 |                          |       |               |
| DOCK1                                | 10  | 128658 | ded cytokinesis 1            | 3                        | 0.051 |                          |       | 0/7           |
| PACS1                                | 11  | 65594  | Pfurin sort prot 1           | 4                        | 0.010 | 7/9                      | 0.019 |               |

Table 2. Cont.

| class/gene                      | chr | kbp    | gene description            | 1: converge then cluster |       | 2: cluster then converge |       | dbGAP support |  |
|---------------------------------|-----|--------|-----------------------------|--------------------------|-------|--------------------------|-------|---------------|--|
|                                 |     |        |                             | #SNPs                    | p     | #SNPs AA/EA              | p     | # SNPs AA/EA  |  |
| CCDC91                          | 12  | 28301  | coiled-coil dom 91          | 10                       | 0.001 | 5/17                     | 0.012 |               |  |
| XPO6                            | 16  | 28016  | exportin 6                  | 4                        | 0.006 | 12/5                     | 0.011 |               |  |
| PMAIP1                          | 18  | 55718  | PMA-induced prot 1          | 3                        | 0.011 | 4/4                      | 0.041 |               |  |
| <i>receptor</i>                 |     |        |                             |                          |       |                          |       |               |  |
| OPRD1                           | 1   | 29011  | $\delta$ opioid rec 1       | 6                        | 0.001 | 10/6                     | 0.011 |               |  |
| PLA2R1                          | 2   | 160506 | Pipase A2 rec 1             | 4                        | 0.006 |                          |       |               |  |
| GRM7*                           | 3   | 6877   | metabo glut rec 7           | 3                        | 0.083 | 4/5                      | 0.226 | 9/34          |  |
| GRIK2                           | 6   | 101953 | ino glut rec kainate 2      | 3                        | 0.071 | 5/4                      | 0.191 | 10/0          |  |
| OR51E1                          | 11  | 4630   | olfactory rec 51 E 1        | 3                        | 0.011 |                          |       |               |  |
| LDLRAD3                         | 11  | 35922  | low dens lipoprot rec A 3   | 3                        | 0.042 | 13/6                     | 0.020 | 6/0           |  |
| GRM5                            | 11  | 87880  | metabo glut rec 5           | 5                        | 0.011 | 20/7                     | 0.015 | 5/0           |  |
| GRIA4                           | 11  | 104986 | ino glut rec AMPA 4         | 3                        | 0.048 |                          |       |               |  |
| COLEC12                         | 18  | 309    | collectin sub-fam 12        | 3                        | 0.031 |                          |       |               |  |
| INSR                            | 19  | 7067   | insulin rec                 | 3                        | 0.032 |                          |       |               |  |
| <i>signaling</i>                |     |        |                             |                          |       |                          |       |               |  |
| BCAR3                           | 1   | 93799  | br ca anti-est res 3        | 3                        | 0.025 |                          |       |               |  |
| TTC21B                          | 2   | 165905 | tetratricopept rep dom 21B  | 4                        | 0.020 | 8/4                      | 0.118 | 10/12         |  |
| TIAM2                           | 6   | 155453 | T-cell lymph inv met 2      | 3                        | 0.032 |                          |       |               |  |
| FAM126A                         | 7   | 22949  | fam seq similar 126 A       | 3                        | 0.022 | 6/4                      | 0.032 |               |  |
| ANO4                            | 12  | 99712  | anoctamin 4                 | 3                        | 0.041 |                          |       | 0/5           |  |
| APPL2                           | 12  | 104091 | pY inter PH dom leu zip 2   | 3                        | 0.021 |                          |       | 9/0           |  |
| <i>structure</i>                |     |        |                             |                          |       |                          |       |               |  |
| INADL                           | 1   | 61980  | InaD-like                   | 3                        | 0.048 |                          |       | 0/9           |  |
| LIMCH1                          | 4   | 41057  | LIM calpon homol dom 1      | 3                        | 0.045 |                          |       |               |  |
| DNAH8                           | 6   | 38798  | dynein h polypept 8         | 4                        | 0.012 | 5/4                      | 0.090 | 4/0           |  |
| MYO6                            | 6   | 76515  | myosin VI                   | 3                        | 0.029 | 4/4                      | 0.091 |               |  |
| AKAP7                           | 6   | 131508 | A kinase anchor prot 7      | 4                        | 0.008 | 4/7                      | 0.040 |               |  |
| SYNE1                           | 6   | 152484 | spectrin rep nuc env 1      | 3                        | 0.058 | 26/5                     | 0.007 | 6/7           |  |
| CADPS2                          | 7   | 121746 | Ca-dep act prot secret 2    | 3                        | 0.063 |                          |       |               |  |
| CHCHD3                          | 7   | 132120 | coil-coil-helix dom 3       | 3                        | 0.039 | 7/4                      | 0.064 |               |  |
| MPP7                            | 10  | 28382  | palmitoyl memb prot 7       | 3                        | 0.033 |                          |       |               |  |
| ABLIM1                          | 10  | 116180 | actin bind LIM protein 1    | 3                        | 0.040 |                          |       |               |  |
| PARVA                           | 11  | 12355  | a parvin                    | 4                        | 0.010 | 4/12                     | 0.018 |               |  |
| CSRP3                           | 11  | 19160  | C G-rich prot 3             | 3                        | 0.016 |                          |       |               |  |
| FARP1                           | 13  | 97593  | FERM RhoGEF pleckst 1       | 3                        | 0.043 |                          |       |               |  |
| MYO5C                           | 15  | 50271  | myosin VC                   | 3                        | 0.023 | 4/9                      | 0.027 |               |  |
| FHOD3                           | 18  | 32131  | formin homol 2 cont 3       | 3                        | 0.056 |                          |       | 0/12          |  |
| <i>transcription regulation</i> |     |        |                             |                          |       |                          |       |               |  |
| PBX1                            | 1   | 162795 | pre-B-cell leukemia TF 1    | 5                        | 0.005 |                          |       |               |  |
| AFF3                            | 2   | 99530  | AF4/FMR2 3                  | 3                        | 0.063 |                          |       |               |  |
| CSRNP3                          | 2   | 166137 | cys-ser-rich nuclear prot 3 | 3                        | 0.029 | 3/3                      | 0.081 | 6/0           |  |
| ZNF804A                         | 2   | 185171 | zinc finger protein 804A    | 4                        | 0.011 | 4/4                      | 0.141 |               |  |
| ZNF385D                         | 3   | 21437  | zinc finger protein 385D    | 3                        | 0.042 | 12/4                     | 0.033 | 0/5           |  |
| ZNF366                          | 5   | 71774  | zinc finger protein 366     | 8                        | 0.001 | 7/11                     | 0.008 |               |  |
| ETV6                            | 12  | 11694  | ets variant gene 6          | 3                        | 0.038 | 4/25                     | 0.004 |               |  |
| KLF12                           | 13  | 73158  | Kruppel-like factor 12      | 4                        | 0.015 | 4/7                      | 0.094 |               |  |
| ZNF606                          | 19  | 63180  | zinc finger protein 606     | 3                        | 0.017 |                          |       |               |  |
| LDOC1L                          | 22  | 43267  | L zip down-reg ca 1-L       | 3                        | 0.012 | 5/4                      | 0.028 |               |  |
| <i>transport</i>                |     |        |                             |                          |       |                          |       |               |  |

**Table 2.** Cont.

| class/gene     | chr | kbp    | gene description               | 1: converge then cluster |       | 2: cluster then converge |       | dbGAP support |
|----------------|-----|--------|--------------------------------|--------------------------|-------|--------------------------|-------|---------------|
|                |     |        |                                | #SNPs                    | p     | #SNPs AA/EA              | p     | # SNPs AA/EA  |
| ATP1B1         | 1   | 167342 | Na/K transpor ATPase $\beta$ 1 | 4                        | 0.004 | 4/4                      | 0.053 | 0/3           |
| SLC45A2        | 5   | 33980  | solute carrier 45 2            | 4                        | 0.005 |                          |       | 11/0          |
| CFTR           | 7   | 116907 | ATP-binding cassette C 7       | 3                        | 0.033 |                          |       | 5/0           |
| XKR4           | 8   | 56177  | Kell blood gp comp 4           | 3                        | 0.051 | 8/8                      | 0.043 |               |
| SLC2A13        | 12  | 38435  | solute ligand carrier 2 13     | 6                        | 0.004 | 17/4                     | 0.019 | 0/8           |
| ABCC4*         | 13  | 94470  | ATP-binding cassette C 4       | 4                        | 0.012 | 13/4                     | 0.023 | 23/30         |
| SLC10A2        | 13  | 102494 | solute ligand carrier10 2      | 3                        | 0.014 | 12/7                     | 0.005 | 0/8           |
| <i>unknown</i> |     |        |                                |                          |       |                          |       |               |
| KIAA1276       | 4   | 17242  | KIAA1276 protein               | 3                        | 0.029 |                          |       |               |
| FLJ44606       | 5   | 126411 | FLJ44606                       | 3                        | 0.016 | 5/4                      | 0.034 |               |
| FAM184A        | 6   | 119322 | fam seq sim 184 A              | 3                        | 0.028 |                          |       |               |
| BRP44L         | 6   | 166698 | brain protein 44-L             | 3                        | 0.015 |                          |       |               |
| FRMD4A         | 10  | 13725  | FERM dom 4A                    | 3                        | 0.071 | 4/23                     | 0.021 | 5/13          |
| C10orf11       | 10  | 77212  | Ch 10 ORF 11                   | 3                        | 0.077 |                          |       |               |
| C10orf82       | 10  | 118413 | Ch 10 ORF 82                   | 3                        | 0.013 | 5/6                      | 0.017 |               |
| C19orf18       | 19  | 63161  | Ch 19 ORF 18                   | 3                        | 0.013 |                          |       |               |
| MACROD2        | 20  | 13924  | MACRO dom 2                    | 3                        | 0.175 | 57/22                    | 0.004 | 6/8           |
| C20orf70       | 20  | 31219  | Ch 20 ORF 70                   | 3                        | 0.014 |                          |       |               |
| RHBDD3         | 22  | 27985  | rhomboid dom 3                 | 3                        | 0.014 |                          |       |               |

These “converge then cluster” genes thus each contain three or more SNPs that display nominally significant allele frequency differences between both European-American (EA) and African-American (AA) polysubstance abuser vs control comparisons that cluster within <25kb of each other and lie within the gene’s exons or within +/- 10 kb 3’ or 5’ flanking sequences. Genes are grouped by the class of the function to which they contribute. The numbers of reproducibly positive SNPs that lay in clusters within the gene’s exons and in 10 kb genomic flanking regions are noted. Chromosome number and initial chromosomal position for the cluster (bp, NCBI Mapviewer Build 36.1) are listed. “Approach 2/Cluster then converge” genes that were identified by clusters of at least 4 nominally positive SNPs that lay within 10kb of each other and lay within the gene for each sample are listed in the column labeled “**2: cluster then converge**”. Asterisk identifies genes also identified in [16]. P values are based on 10,000 Monte Carlo simulation trials in which the number of times randomly-selected segments of the genome that lie within genes are assessed for the same features displayed by the actual gene identified. Relevant rs numbers for SNPs are listed in Table S2. dbGAP support lists the numbers of SNPs in the same genes that display nominally-significant differences between cocaine-dependent and nondependent control AA and EA samples from 1M SNP Illumina individual genotyping of samples from COGA, FSCD and COGEND samples as described in dbGAP (<http://www.ncbi.nlm.nih.gov/sites/entrez?Db=gap>). doi:10.1371/journal.pone.0008832.t002

values for thalamus and hippocampus ( $p = 0.032$  and  $0.045$ , respectively) retained significance. Assessments of the “more reliable” subset of ESTs revealed significant over expression in hippocampus and whole brain (corrected  $p \approx 0.01$  for each).

## Discussion

### “Replication” of Genome Wide Association Results

Genome-wide association data of increasing richness is available for a number of complex disorders. Several of these GWA datasets contain relatively robust results at “oligogenic” loci that can also be identified by linkage-based approaches [39–42]. Even moderately secure GWA identification of “polygenic” influences on disease, however, is likely to require replicated data from multiple independent samples.

There have been no unanimous criteria for declaring such replication in circumstances in which no SNP provides “genome wide significance” with the same phase of association in “template” GWA analyses of data from multiple independent samples. Replication of nominally significant associations for the same SNP (approach (1), here) is among the criteria most used to date [43,44]. This “nontemplate” GWA analytic approach is likely to perform best when large association signals are found in each independent sample, when the same SNP sets are studied in each,

when the disease exhibits little locus heterogeneity and when there are good matches between the fine patterns of linkage disequilibrium of the samples being studied and the reference samples (commonly, Hap Map) used to infer the underlying patterns of linkage disequilibrium. Few “replication” samples manifest all of these features. Although the current European- and African-American samples were recruited in parallel and evaluated with the same SNPs, the racial/ethnic differences between the participants suggest that the samples are likely to manifest differences in fine patterns of linkage disequilibrium and in phase of association at many loci. Apparent replication “failures” using approach (1) could thus relate to sample-to-sample differences in fine patterns of linkage disequilibrium and/or different amounts of information provided by markers with population-specific differences in allelic frequencies. Allelic heterogeneities could also make contributions. Conceivably, genes for which the Monte Carlo  $p$  values determined by approach (2) are much stronger than the estimates based on approach (1) might provide interesting candidates for such allelic heterogeneity. Positive findings in the “cluster than converge” approach that are supported by evidence from other studies might be especially attractive candidates. NRXN3 and GABBR2 were identified using this approach and also in linkage studies of opiate dependence [45] and association studies of nicotine dependence [6,46], for example.

## “Converge Then Cluster” and “Cluster Then Converge” Approaches

Results from approaches (1) and (2) share a number of potential strengths. These datasets provide significant concordance with each other, with previous GWA datasets for substance dependence, and with dbGAP data that has been available only after the results of the current study were analyzed. The arrays used here provide power to identify many of the genes, especially genes of smaller size, which could not have been identified in previous GWA studies that used analysis (1) and lower density arrays [25].

Monte Carlo methods allow us to test the probabilities of chance clustering of nominally positive SNPs and the chance of convergence between clusters identified in one sample with clusters identified in other samples. Our Monte Carlo approaches deploy an empirical method that uses the existing dataset as a source for randomly selected SNPs for each Monte Carlo trial. The results of these simulations, supported by data derived from permutation, principal components and other analyses, provide strong overall confidence that these results are not due to chance. By contrast, these approaches provide absolutely unequivocal identification for few individual SNPs. This lack of unequivocal identification of individual SNPs is consistent with the current polygenic working models for the genetic architecture of vulnerability to substance abuse [25,47].

## Differences between “Non-Template” and “Template” GWA Approaches

Validation studies provide evidence for excellent correlations between individually genotyped and pooled allele frequency assessments. However, the current “nontemplate” approaches and data do provide a number of differences from the “template” genome wide association approaches used in recent reports from larger projects that employ individual genotyping in studies of legal phenotypes, for example the GWA studies of complex phenotypes currently listed in dbGAP (<http://www.ncbi.nlm.nih.gov/sites/entrez?Db=gap>). 1a) The samples for these studies are typically compiled from recruitments at many sites. The studies typically combine subjects recruited based on multiple sets of criteria for selection. There is no indication of the fraction of individuals approached who consented. Cases are compared to controls who were almost always recruited and collected at different times and are either uncharacterized or evaluated using methods different from those applied to cases. 1b) By comparison, all of the dependent and control individuals studied in the present sample were collected at the same site, recruited in ways that result in virtually all candidates consenting to participation, and assessed using the same instruments. Controls are thus characterized in such a manner that they each provide a contrast with the dependent cases. 2a) Genotyping data in dbGAP typically uses data from single microarrays that are hybridized with fluorescently-labeled DNAs prepared from DNAs from single individuals, hybridization intensities assessed, and genotype calls made based on Bayesian and other algorithms using data from the ratios of hybridization intensities to probes that are complementary to alternative allelic forms of each SNP. Quality control efforts for samples and SNPs use predetermined algorithms for hybridization signal differences and analyses of Hardy-Weinberg equilibria. Few studies provide test-retest data to evaluate the fraction of genotypes that are replicable, however. 2b) The current approach uses data from three microarrays that are hybridized with three distinct preparations of fluorescently labeled DNA that are carefully prepared from pools of DNA from 20 individuals. Quality control evaluations come chiefly from assessment of the array-to-array variation in hybridization intensities noted for replicate

experiments, as well as assessments of pool-to-pool variation, as noted here. These assessments thus do not measure the features that are assessed by Affymetrix or Illumina software packages, but rely on estimates of variability in relation to the signals obtained. The 0.98+ correlation between observed and expected allele frequencies provides a modest difference from a set of perfectly accurate individual genotypes. 3a) The sample sizes in studies currently listed in dbGAP are larger, with an average size of 2,155 cases and controls 3b) The sample size here of 1,620 is divided into two separate case *vs* control comparisons, providing, as we note, moderate power to detect replicable modest-sized effects and lower power to detect very small effects. True effects that provide nominal statistical significance in clustered SNPs in only one sample represent false-negative findings in our first analysis. 4a) Many of the results of individually-genotyped studies represented in dbGAP are analyzed based on the assumption that the detailed haplotype structures identified in data from CEPH and Yoruban individuals will provide accurate representations of the haplotypes identified in European-American and African-American samples identified far from Utah. 4b) The approach that we use here is based on distances between SNP genomic markers, rather than assumptions about the extent to which the exact haplotype structure of these reference populations will be maintained in the samples that we have studied. 5a) Dense individual genotypes provide the opportunity for unequivocal matching with DNA databases; 5b) Pooled genotypes provide a much stronger barrier for matching with DNA databases, which is an enhanced consideration in studies of illegal behaviors. 6a) “Template” analyses focus on strength of association for individual SNPs; 6b) The current analyses assume that most *bona fide* associations that are based on phenotypic differences will be present at multiple nearby SNPs. In any single sample, many of the clusters of positive findings at nearby SNPs could be due to stochastic differences in haplotype frequencies between cases and controls that are not related to phenotype. As the same chromosomal regions are identified by more and more independent samples, however, the likelihood that such identification is due to stochastic differences in haplotype frequencies that are unrelated to phenotype declines sharply. Assessment in multiple, independent samples, as we perform here, provides the best control for stochastic differences in haplotype frequencies that might be expected, by chance, between any single case and control samples. 7a) “Template” GWA analyses that focus on single SNPs may provide modest biases toward identification of large genes that contain many SNPs; 7b) The current analyses require nominally significant associations for multiple SNPs that lie within narrow chromosomal regions. A number of the smallest genes cannot be identified by this approach [25], in ways that might lead to an even more prominent bias toward identification of larger genes in this way; 8a) “Template” GWA approaches focus on metaanalyses as means to evaluate convergence of data from single SNPs across many independent samples; 8b) As more such data becomes available, metaanalyses can be applied to the current results. However, in the relative absence of other GWA datasets (*but see below*), metaanalyses are of more limited utility.

## Genes Also Identified in Other Studies of Addiction

Despite the differences in approaches, primary substance of abuse and/or genetic background, however, there is significant evidence that, compared to chance, the current results identify more of the same genes and chromosomal regions that are also identified by a number of independent datasets that compare substance dependence phenotypes to controls. These include the fits between the current nontemplate analyses of data from pooled African- and European-American samples and previously-report-



ed pooled results from Asian methamphetamine dependence samples as well as individual genotyping results that compare dependent *vs* nondependent smokers. Analyses of cocaine dependence *vs* control data that has become available on dbGAP after our analyses were completed provide support for 162 of the clusters of nominally-positive result from the European-American samples reported herein by clusters of at least 4 SNPs that display  $p < 0.05$  nominal significance in this dbGAP data (Monte Carlo  $p < 0.0001$ ) (Drgon et al, in preparation). Data for African-American samples provides support for 147 of the clustered, nominally significant observations from our current report (Monte Carlo  $p < 0.0001$ ) (Drgon et al, in preparation).

Our identification of some SNP markers whose allelic frequencies distinguish controls from addicts of different ethnicities supports “common disease/common allele” genetic architecture for significant portions of addiction vulnerability [48] based on relatively old allelic variants. The good fits between results from ethnically-matched samples from the current data and dbGAP samples also support the idea that many addiction vulnerability variants are likely to display substantial differences from one human population to another (Drgon et al, in preparation). In our current data, the same phase is not detected for many of the SNP associations noted in samples of different racial/ethnic backgrounds. Although we believe that this is a likely consequence of the differences in detailed linkage disequilibrium between the SNP markers and the actual pathogenic allelic variants at many of these chromosomal loci, some of these phase differences are also likely to reflect results that occur in the two independent samples by chance.

The convergent data derived from studies of individuals with addictions to substances in several different pharmacological classes support the idea that many of these allelic variants enhance vulnerability to many addictions. These results do not exclude additional contributions to addiction vulnerability from genomic variants that influence vulnerability to specific substances or variants that are found only in specific populations, however.

### Classes of Genes Identified Here

We focus on identification of genes. Although associations in chromosomal regions that do not contain annotated genes also provide interesting results, the genes that we identify in the present work provide a number of interesting views of addiction. 1) More are represented among cDNAs cloned from brain libraries than is the case for all human genes. While all do not display at least two cDNAs in at least one brain library represented in dbEST, it seems likely that many of the remaining genes are expressed at low levels and/or in small brain regions that are not adequately represented in many of these libraries. 2) The results from dbEST studies of the expression of these genes focus attention on expression in hippocampus, which manifests interesting roles in mnemonic processes in ways that may provide clues to the pathophysiology of human addiction. 3) These genes do not overlap, to extents greater than expected by chance, with genes listed in the Knowledgebase for Addiction Related Genes (KARG), a recent compilation of literature and database information concerning addiction related genes [49]. 4) Gene ontology searches (BioBase) reveal “Biological Process” terms that displayed the strongest trends toward overrepresentation (compared to Bonferroni-corrected  $p = 7.8 \times 10^{-5}$ ) among human gene classes: glutamate signaling pathway ( $p = 0.00019$ ); auditory receptor cell differentiation ( $p = 0.0047$ ); endocytosis ( $p = 0.0065$ ); sex determination ( $p = 0.0081$ ); inner ear receptor cell differentiation ( $p = 0.0081$ ); endothelial cell proliferation ( $p = 0.0088$ ); synaptic transmission ( $p = 0.01$ ); mechanoreceptor differentiation ( $p = 0.01$ ); adult locomotor behavior ( $p = 0.01$ ) and regulation of synaptic plasticity ( $p = 0.01$ ).

Mouse data for glutamate signaling pathway ( $p = 8.2 \times 10^{-6}$ ) provides the strongest *p* values that do exceed the Bonferroni correction (data not shown).

Identification of cell adhesion molecule genes, which are represented in several of the above mentioned gene classes (Table 2) continues to focus our attention on roles in addiction for mechanisms for establishing and regulating neuronal connections [50–52]. These data accord well with prior results that link substance dependence to 5′ NrCAM variants that alter levels of expression and to 3′ NRXN3 variants that alter relative levels of splicing isoforms [45,53]. It is important to note that these cell adhesion genes are generally large, providing more opportunities for allelic variants that could alter their functions in a number of fashions. It is interesting to note that recent analyses of all reported genome wide association datasets also identified overrepresentation of cell adhesion molecule genes [54].

We also identify genes that are likely to be readily targeted and modulated by drugs, and thus provide potential pharmacotherapeutic targets for addictions. G protein coupled receptors that include the  $\delta$  opioid receptor and metabotropic glutamate receptor 5 display rich pharmacologies and substantial ties to addiction through abundant evidence from pharmacologic, knockout mouse and other approaches. Glutamatergic systems are also implicated by identification of “druggable” metabotropic 7, GRIK2 kainate and GRIA4 AMPA glutamate receptors, as well as several cell adhesion molecules that are associated with classical synapses. Known small molecules and/or drugs act at many of the other receptors, enzymes and transporters listed in Table 2.

### Genes Also Identified in Studies of Heritable, Co-Occurring Phenotypes

A number of the genes identified in this work are also identified in genome wide association and/or candidate gene datasets for heritable disorders or phenotypes that co-occur with addictions [25]. Differences in memory and cognitive systems have long been identified in addicted individuals; we have identified significant overlaps between the addiction associated genes listed below and the results of GWA studies for individual differences in cognitive abilities. NRXN3 and a number of other genes listed in Table 2 also display associations with the memory-associated neurodegenerative disorder, Alzheimer’s disease (Hishimoto et al, submitted). Frontal lobe volumes are smaller in several studies of substance dependent individuals or their offspring; there is significant overlap between GWA results for frontal lobe volumes and addiction [25]. Overall GWA results for bipolar disorder, in which a majority of individuals may abuse or be dependent on addictive substances, overlap with addiction GWA data [25]. There is also a significant overall overlap between addiction vulnerability GWA data and the genes identified in studies of success in smoking cessation [25].

### Conclusions

The findings presented here promise to add to the ongoing consideration of methods for comparing GWA datasets as they enhance understanding of genetic underpinnings of human addiction. For addictions, as for many complex disorders, such data provides an increasingly rich basis for improved understanding and for personalized prevention and treatment strategies.

### Materials and Methods

#### NIDA Research Volunteers

Research volunteers who came to the NIDA research facility in Baltimore, Maryland between 1990 and 2007 in response to advertisements and referrals from other research volunteers

provided written informed consents, self-reported ethnicity data, drug use histories *via* the Drug Use Survey and DSMIII-R or IV diagnoses and were reimbursed for their time at different rates during this period (currently about \$120 total) as previously described [13,55,56]. DNA in 81 pools sampled: a) 400 unrelated European-American “abusers” (mean age and standard deviation = 34 (+/-2), 0.79 male) with heavy lifetime use of illegal substances and, for virtually all, DSMIII-R/IV dependence on at least one illegal abused substance b) 280 “control” European-Americans (mean age 32 (+/-3), 0.6 male) who reported no significant lifetime use of any addictive substance, c) 700 African-American abusers (mean age 34 (+/-3), 0.75 male) and d) 240 African-American controls (mean age 35 (+/-5), 0.43 male) [13,14,16]. The modest differences between mean ages of dependent and control individuals would be expected to yield virtually no differences in cumulative lifetime probabilities of developing dependence on one or more illegal substances, based on data from the National Survey of Drug Use in Households (<http://oas.samhsa.gov/nsduh/2k7nsduh/2k7Results.cfm#TOC>).

DNAs were assessed in pools since this: 1) provided us with the maximal ability to protect the genetic confidentiality of subjects who volunteered for study of genetics of illegal behaviors, 2) allowed us to utilize DNAs from individuals who consented to participation in this study during time periods when consents did not explicitly describe studies using high densities of DNA markers, 3) allowed us to utilize DNAs from individuals whose consents explicitly committed us to use DNA pooling methods wherever possible to maximize protection of their genetic confidentiality, 4) allowed us to use methods that we have developed and validated in this and in previous work and 5) reduced costs. Most of these subjects would thus not have been available for studies that assessed substantial numbers of polymorphisms using individual genotyping.

DNA was prepared from blood [13,55,56]. Genotyping and primary assessments of genotyping were performed by investigators blinded to clinical diagnoses. DNAs from groups of 20 individuals of the same ethnicity and phenotype were carefully quantitated and combined. This number of individuals/pool was selected since we have extensively validated use of pools of this size [13–17,37,38] with respect to statistical power as well as the advantages and disadvantages of pooling noted above. Hybridization probes were prepared as described (Affymetrix assay 6.0, [15]). For each pool 150 ng of pooled DNA was processed, labeled and hybridized to Affymetrix 6.0 arrays according to the instructions of the manufacturer (Affymetrix, Santa Clara CA) and [13–15]. Quality controls for assays were performed as recommended (Affymetrix, Santa Clara CA) and (Fig. S2). Features of this portion of methods are depicted in Fig. S1.

### Identification of Nominally-Positive SNPs

For NIDA individuals allele frequencies for each SNP in each DNA pool were assessed based on hybridization to the 3–4 “perfect match” cells on each of three arrays, as described [14,15]. We validated this approach (Fig. 1) [14,15]. The intensities of the highest and lowest 5% of features on each array were monitored and the variances in signal between replicate hybridizations of DNA from each pool and between hybridization signals from pools of the same phenotype and ethnicity were assessed. For the detection of nominally positive SNPs we averaged the “perfect match” data for each SNP on each array, derived the arctangent of the ratio between hybridization intensities for A and B alleles, averaged the arctan A/B values for the three replicate arrays, divided the mean arctan A/B ratios for abusers by the mean arctan A/B ratios for controls to form an abuser/control ratio for

each SNP, and generated a “t” statistic for the differences between arctan A/B in abusers and controls with corresponding p values (see Fig. S1 for this portion of the “cluster then converge” analysis and Fig S2 for initial quality control).

We deleted data from SNPs on sex chromosomes. This allowed us to combine data from male and female subjects and increase overall power. We also deleted data for SNPs whose chromosomal positions could not be adequately determined.

### Identification of Genes That Contained Convergent Data from Two Samples: 1) “Converge Then Cluster”

For these analyses, we identified “reproducibly-positive” SNPs that cluster in small genomic regions within genes (Table 1). These SNPs a) display t values with  $p < 0.05$  significance in both African- and European-American abuser *vs* control comparisons (we define this evidence for significant association in each of two independent samples as “reproducible”), b) cluster, so that at least three reproducibly-positive SNPs lie within 25kb of other reproducibly-positive SNPs, c) identify genes (Table 2, *legend*). The 104 genes in Table 2 are supported by reproducible clustered positive association data from the same SNPs in each of two samples. We identify subsets of these genes when we impose more stringent criteria for: a)  $\leq 10,000$  basepair distances between reproducibly-positive SNPs, and b) at least 4 nominally-positive SNPs per cluster (Table 1).

### Identification of Genes That Contained Convergent Data from Two Samples: 2) “Cluster Than Converge”

To provide complementary analyses, we began by identifying clusters of positive SNPs that fall within genes in each sample. We identify the genes that are tagged by at least one cluster of nominally positive SNPs from each of the two samples (Table 1). We focus on a set of criteria for approach (2) that produce about the same ratio of “true” genes to total genes (“true”+“chance”) (0.43 *vs* 0.47) as those likely to be observed using the criteria on which we focused in approach (1). The SNPs that we identify in this secondary analysis thus a) display t values with  $p < 0.05$  significance in one abuser *vs* control comparison, b) cluster, so that at least four of these positive SNPs lie within 10kb of each other in this abuser *vs* control comparison, c) identify the same genes as clustered positive SNPs from the other sample (Table 2, *legend*, and Table S1). Three hundred forty one genes are identified in this way (Table S1). Fifty-two of the 104 genes listed in Table 2 based on approach (1) are also identified after application of the criteria noted above and approach (2). See Fig. S1 (points 4–6) for details of the last steps of “cluster then converge” analyses:

The sets of results from approaches (1) and (2) were compared to those expected by chance using 100,000 Monte Carlo II simulation trials (below) ([36] and below, and Johnson et al, in preparation). For each of 100,000 simulation trials, a random set of SNPs was chosen by sampling randomly from a list that contained all SNPs studied. The randomly chosen SNPs were considered “pseudopositive” SNPs for that trial. The number of trials for which the results from “pseudopositive” SNPs subjected to our analytical procedure matched or exceeded the results actually observed from the SNPs identified in the current study was tabulated. Empirical p values were calculated by dividing the number of trials for which the observed results were matched or exceeded by the total number of Monte Carlo simulation trials. Similar Monte Carlo III approaches ([36] and below) sampled from a dataset of all gene sequences. These approaches allowed us to generate nominal p values for the observations made for each gene listed in Table 2.

Monte Carlo I assessments [36] thus provided p values for the extent to which clustering of nominally positive SNPs (from each of 2 samples in “converge then cluster” approach and from each sample in “cluster then converge” approach) differed from chance. Monte Carlo II assessments [36] provided p values for the degree to which clusters identified in one of the samples from the “cluster then converge” approaches were found in the same genes as those identified by clusters from the other sample. Monte Carlo III assessments [36] provided p values for the likelihood of finding of sets of nominally-positive SNPs in segments of each of the genes identified here (Johnson et al, in preparation).

Secondary analysis used permutation approaches. We randomized assignment of the phenotypes to data derived from the current SNPs and analyzed the data in each of the 10,000 permutation trials.

To assess the power of our current approach we used current sample sizes and standard deviations, power calculator PS v2.1.31 [57,58] and  $\alpha=0.05$ . Results from “Gene detective” [25] provided a secondary power assessment.

To provide controls for the possibility that observed abuser-control differences were due to a) occult ethnic/racial allele frequency differences or b) noisy assays, we assessed the overlap between our results and SNPs that displayed the largest a) allele frequency differences between African-American *vs* European-American control individuals and b) the largest assay “noise”.

To seek patterns of human brain expression for the genes identified herein, we identified 846 human cDNA libraries constructed from brains with modest or no pathology in dbEST. We identified 1) all entries and 2) “more reliable” entries with correct genomic orientation and either evidence for polyA tail or spliced structure (CYL and GRU, in preparation). For each brain region, we assessed the *p*-value for over-representation of expression of the addiction-associated genes using hypergeometric distribution tests and false discovery rate (FDR) corrections, considering *Q*-values < 0.05 as statistically significant.

### dbGAP Samples from the Family Study of Cocaine Dependence, COGA and COGEND Studies

Unrelated subjects who met DSM criteria for cocaine dependence and control subjects with no evidence for dependence on any addictive substance were assembled from three studies. Family study of cocaine dependence subjects were recruited from treatment centers close to St. Louis, Mo; 55% of contacted subjects participated. Community-based comparison subjects were recruited through driver’s license records from the Missouri Family Registry and were matched to cocaine dependent subjects based on date of birth, ethnicity, gender, and zip code. Eighty percent of screened and eligible comparison subjects participated. Other participants came from individuals who participated in the collaborative study on the genetics of alcoholism and the collaborative study on the genetics of nicotine dependence. Dependent individuals displayed DSM dependence on cocaine as reflected in the dbGAP variable phv00066444.v1.p1. Controls displayed no DSM dependence on cocaine, nicotine, alcohol, marijuana, opioids or other drugs. We identified 481 dependent and 1053 control unrelated European-American and 516 dependent and 409 control unrelated African-American subjects for this analysis. Genotyping for these samples was performed using Illumina 1M SNP arrays at the Center for Inherited Disease Research (CIDR), with quality controls and principal components analysis (PCA) controls for racial/ethnic background available at the CIDR website (www.cidr.jhmi.edu). Genotypes from dependent and control individuals were selected from dbGAP files. p

values for each SNP were based on  $\chi^2$  tests. The resulting p values were then analyzed and compared to the results from the NIDA individuals by the “cluster then converge” method described above.

Gene Ontology analysis was performed in BioBase Systems Biology Environment (<http://www.biobase.de>) installed on <http://helixweb.nih.gov/biobase>.

### Supporting Information

**Figure S1** Simplified schematics for methods used in the current analyses. A: Methodological schematic. First two lines denote separation of African-American and European-American samples into “case”, “control” and “other” phenotypes. Third line denotes pooling DNAs from groups of 20 individuals of the same racial/ethnic and phenotype group. Lines 4–6 denote analyzing DNA from each of the pools using three independent Affymetrix 6.0 array assays. B: Analytic schematic. Points 1–3 and “Manhattan plots” indicate analyses that identify SNPs with nominally-significant case vs control differences. Point 4a: Converge then cluster analysis. Point 4b: Cluster then converge analysis. Point 5 emphasizes gene-centered analysis used herein.

Found at: doi:10.1371/journal.pone.0008832.s001 (0.07 MB PDF)

**Figure S2** QQ plots for distribution of t values from African-American data (left) and European American data (right). Observed data from these experiments provides deviations from expected data generated from 10,000 t tests which were each run from a set of random values of the same size as those obtained from the true datasets. Deviations noted at the right side of these plots are likely to represent both a) true case vs control differences and b) nonnormal differences in the distribution of t values from the bona fide data. In the current “nontemplate” analyses, we use t values to identify the 5% of SNPs with the highest t values and subsequent testing with empirical statistics to assign overall levels of significance. Thus, any nonnormal component of this distribution is of less concern than it would be for “template” GWA analyses in which t values might be used as the primary determinant of (e.g., genome wide) significance.

Found at: doi:10.1371/journal.pone.0008832.s002 (0.03 MB PDF)

**Table S1** Genes identified by “cluster then converge” secondary analyses (2), as described in the text. These genes are thus each identified by clusters of four or more SNPs that display nominally significant allele frequency differences between polysubstance abuser vs control comparisons, cluster within <10kb of each other and lie within the gene’s exons or within +/– 10 kb 3’ or 5’ flanking sequences. Note that for this analysis, the same SNPs are not required to display nominal significance in each of the two samples. p values are based on 10,000 Monte Carlo simulation trials in which the number of times randomly-selected segments of the genome that lie within genes are assessed for the same features displayed by the actual gene identified. Some, but not all, of these genes are also identified by (1) converge then cluster analyses as noted in Table 1 and by clustered nominally-significant SNPs from dbGAP datasets, as noted in Table 2.

Found at: doi:10.1371/journal.pone.0008832.s003 (0.04 MB PDF)

**Table S2** List of RS numbers and chromosomal location identified as “positive” that are the basis for identification of the genes in Table 2 in the manuscript.

Found at: doi:10.1371/journal.pone.0008832.s004 (0.03 MB PDF)

## Acknowledgments

Dr. Qing-Rong Liu aided technical analyses and Mr C-Y Li aided statistical analyses. We are grateful for help with clinical characterization of subjects from Dan Lipstein, Fely Carillo and other Johns Hopkins-Bayview support staff, and passionate discussions of statistical issues with Dr Daniel Naiman. This study utilized the high-performance computational capabilities of the Helix Systems at the National Institutes of Health, Bethesda, MD (<http://helix.nih.gov>).

## References

- Uhl GR, Elmer GI, Labuda MC, Pickens RW (1995) Genetic influences in drug abuse. In: Gloom FE, Kupfer DJ, eds. *Psychopharmacology: The Fourth Generation of Progress*. New York: Raven Press. pp 1793–2783.
- Tsuang MT, Lyons MJ, Meyer JM, Doyle T, Eisen SA, et al. (1998) Co-occurrence of abuse of different drugs in men: the role of drug-specific and shared vulnerabilities. *Arch Gen Psychiatry* 55: 967–972.
- Karkowski LM, Prescott CA, Kendler KS (2000) Multivariate assessment of factors influencing illicit substance use in twins from female-female pairs. *Am J Med Genet* 96: 665–670.
- True WR, Heath AC, Scherrer JF, Xian H, Lin N, et al. (1999) Interrelationship of genetic and environmental influences on conduct disorder and alcohol and marijuana dependence symptoms. *Am J Med Genet* 88: 391–397.
- Kendler KS, Karkowski LM, Neale MC, Prescott CA (2000) Illicit psychoactive substance use, heavy use, abuse, and dependence in a US population-based sample of male twins. *Arch Gen Psychiatry* 57: 261–269.
- Bierut IJ, Madden PA, Breslau N, Johnson EO, Hatsukami D, et al. (2007) Novel genes identified in a high-density genome wide association study for nicotine dependence. *Hum Mol Genet* 16: 24–35.
- Saccone SF, Hinrichs AL, Saccone NL, Chase GA, Konvicka K, et al. (2007) Cholinergic nicotinic receptor genes implicated in a nicotine dependence association study targeting 348 candidate genes with 3713 SNPs. *Hum Mol Genet* 16: 36–49.
- Amos CI, Wu X, Broderick P, Gorlov IP, Gu J, et al. (2008) Genome-wide association scan of tag SNPs identifies a susceptibility locus for lung cancer at 15q25.1. *Nat Genet*.
- Thorgeirsson TE, Geller F, Sulem P, Rafnar T, Wiste A, et al. (2008) A variant associated with nicotine dependence, lung cancer and peripheral arterial disease. *Nature* 452: 638–642.
- Hung RJ, McKay JD, Gaboricau V, Boffetta P, Hashibe M, et al. (2008) A susceptibility locus for lung cancer maps to nicotinic acetylcholine receptor subunit genes on 15q25. *Nature* 452: 633–637.
- Luzak SE, Elvine-Kreis B, Shea SH, Carr LG, Wall TL (2002) Genetic risk for alcoholism relates to level of response to alcohol in Asian-American men and women. *J Stud Alcohol* 63: 74–82.
- Schuckit MA, Duby J (1982) Alcohol-related flushing and the risk for alcoholism in sons of alcoholics. *J Clin Psychiatry* 43: 415–418.
- Uhl GR, Liu QR, Walther D, Hess J, Naiman D (2001) Polysubstance abuse-vulnerability genes: genome scans for association, using 1,004 subjects and 1,494 single-nucleotide polymorphisms. *Am J Hum Genet* 69: 1290–1300.
- Liu QR, Drgon T, Walther D, Johnson C, Poleskaya O, et al. (2005) Pooled association genome scanning: validation and use to identify addiction vulnerability loci in two samples. *Proc Natl Acad Sci U S A* 102: 11864–11869.
- Johnson C, Drgon T, Liu QR, Walther D, Edenberg H, et al. (2006) Pooled association genome scanning for alcohol dependence using 104,268 SNPs: validation and use to identify alcoholism vulnerability loci in unrelated individuals from the collaborative study on the genetics of alcoholism. *Am J Med Genet B Neuropsychiatr Genet* 141: 844–853.
- Liu QR, Drgon T, Johnson C, Walther D, Hess J, et al. (2006) Addiction molecular genetics: 639,401 SNP whole genome association identifies many “cell adhesion” genes. *Am J Med Genet B Neuropsychiatr Genet* 141: 918–925.
- Uhl GR, Drgon T, Liu QR, Johnson C, Walther D, et al. (2008) Genome-wide association for methamphetamine dependence: convergent results from 2 samples. *Arch Gen Psychiatry* 65: 345–355.
- Sullivan PF (2007) Spurious genetic associations. *Biol Psychiatry* 61: 1121–1126.
- Sklar P, Smoller JW, Fan J, Ferreira MA, Perlis RH, et al. (2008) Whole-genome association study of bipolar disorder. *Mol Psychiatry*.
- Kavvoura FK, Ioannidis JP (2008) Methods for meta-analysis in genetic association studies: a review of their potential and pitfalls. *Hum Genet* 123: 1–14.
- Gorroochurn P, Hodge SE, Heiman GA, Durner M, Greenberg DA (2007) Non-replication of association studies: “pseudo-failures” to replicate? *Genet Med* 9: 325–331.
- Khoury MJ, Little J, Gwinn M, Ioannidis JP (2007) On the synthesis and interpretation of consistent but weak gene-disease associations in the era of genome-wide association studies. *Int J Epidemiol* 36: 439–445.
- Ioannidis JP (2007) Non-replication and inconsistency in the genome-wide association setting. *Hum Hered* 64: 203–213.
- Carlson CS, Eberle MA, Kruglyak L, Nickerson DA (2004) Mapping complex disease loci in whole-genome association studies. *Nature* 429: 446–452.

## Author Contributions

Conceived and designed the experiments: GU. Performed the experiments: TD PWZ CJ DW JH. Analyzed the data: TD CJ MN GU. Contributed reagents/materials/analysis tools: TD PWZ CJ MN. Wrote the paper: TD GU.

- Uhl GR, Drgon T, Johnson C, Li CY, Contoreggi C, et al. (2008) Molecular genetics of addiction and related heritable phenotypes: genome-wide association approaches identify “connectivity constellation” and drug target genes with pleiotropic effects. *Ann N Y Acad Sci* 1141: 318–381.
- Macgregor S, Visscher PM, Montgomery G (2006) Analysis of pooled DNA samples on high density arrays without prior knowledge of differential hybridization rates. *Nucleic Acids Res* 34: e55.
- Meaburn E, Butcher LM, Schalkwyk LC, Plomin R (2006) Genotyping pooled DNA using 100K SNP microarrays: a step towards genomewide association scans. *Nucleic Acids Res* 34: e27.
- Craig DW, Huentelman MJ, Hu-Lince D, Zismann VL, Kruer MC, et al. (2005) Identification of disease causing loci using an array-based genotyping approach on pooled DNA. *BMC Genomics* 6: 138.
- Butcher LM, Meaburn E, Knight J, Sham PC, Schalkwyk LC, et al. (2005) SNPs, microarrays and pooled DNA: identification of four loci associated with mild mental impairment in a sample of 6000 children. *Hum Mol Genet* 14: 1315–1325.
- Butcher LM, Meaburn E, Dale PS, Sham P, Schalkwyk LC, et al. (2005) Association analysis of mild mental impairment using DNA pooling to screen 432 brain-expressed single-nucleotide polymorphisms. *Mol Psychiatry* 10: 384–392.
- Bang-Ce Y, Peng Z, Bincheng Y, Songyang L (2004) Estimation of relative allele frequencies of single-nucleotide polymorphisms in different populations by microarray hybridization of pooled DNA. *Anal Biochem* 333: 72–78.
- Sham P, Bader JS, Craig I, O'Donovan M, Owen M (2002) DNA Pooling: a tool for large-scale association studies. *Nat Rev Genet* 3: 862–871.
- Hinds DA, Seymour AB, Durham LK, Banerjee P, Ballinger DG, et al. (2004) Application of pooled genotyping to scan candidate regions for association with HDL cholesterol levels. *Hum Genomics* 1: 421–434.
- Knight J, Saccone SF, Zhang Z, Ballinger DG, Rice JP (2009) A comparison of association statistics between pooled and individual genotypes. *Hum Hered* 67: 219–225.
- Barnes MR, Bhinder TK, Elango R, Goodgame N, Ehm MG, et al. High density genome scanning using Affymetrix chips: Indications of genome coverage and capture of variation based on the HapMap ENCODE regions; 2005 10/25–10/29 2005; Salt Lake City, Utah.
- Johnson C, Drgon T, McMahon FJ, Uhl GR (2009) Convergent genome wide association results for bipolar disorder and substance dependence. *Am J Med Genet B Neuropsychiatr Genet* 150B: 182–190.
- Uhl GR, Liu QR, Drgon T, Johnson C, Walther D, et al. (2008) Molecular genetics of successful smoking cessation: convergent genome-wide association study results. *Arch Gen Psychiatry* 65: 683–693.
- Uhl GR, Liu QR, Drgon T, Johnson C, Walther D, et al. (2007) Molecular genetics of nicotine dependence and abstinence: whole genome association using 520,000 SNPs. *BMC Genet* 8: 10.
- Haines JL, Hauser MA, Schmidt S, Scott WK, Olson LM, et al. (2005) Complement factor H variant increases the risk of age-related macular degeneration. *Science* 308: 419–421.
- Hageman GS, Anderson DH, Johnson LV, Hancox LS, Taiber AJ, et al. (2005) A common haplotype in the complement regulatory gene factor H (HF1/CFH) predisposes individuals to age-related macular degeneration. *Proc Natl Acad Sci U S A* 102: 7227–7232.
- Lambert JC, Amouyel P (2007) Genetic heterogeneity of Alzheimer's disease: complexity and advances. *Psychoneuroendocrinology* 32 Suppl 1: S62–70.
- McElroy JP, Oksenberg JR (2008) Multiple sclerosis genetics. *Curr Top Microbiol Immunol* 318: 45–72.
- Zeggini E, Scott LJ, Saxena R, Voight BF, Marchini JL, et al. (2008) Meta-analysis of genome-wide association data and large-scale replication identifies additional susceptibility loci for type 2 diabetes. *Nat Genet* 40: 638–645.
- Gershon ES, Liu C, Badner JA (2008) Genome-wide association in bipolar. *Mol Psychiatry* 13: 1–2.
- Lachman HM, Fann CS, Bartzis M, Evgrafov OV, Rosenthal RN, et al. (2007) Genomewide Suggestive Linkage of Opioid Dependence to Chromosome 14q. *Hum Mol Genet*.
- Beuten J, Ma JZ, Payne TJ, Dupont RT, Crews KM, et al. (2005) Single- and multilocus allelic variants within the GABA(B) receptor subunit 2 (GABAB2) gene are significantly associated with nicotine dependence. *Am J Hum Genet* 76: 859–864.

47. Uhl GR, Drgon T, Johnson C, Fatusin OO, Liu QR, et al. (2008) "Higher order" addiction molecular genetics: convergent data from genome-wide association in humans and mice. *Biochem Pharmacol* 75: 98–111.
48. Lander ES, Schork NJ (1994) Genetic dissection of complex traits. *Science* 265: 2037–2048.
49. Li CY, Mao X, Wei L (2008) Genes and (common) pathways underlying drug addiction. *PLoS Comput Biol* 4: e2.
50. Qiu S, Korwek KM, Weeber EJ (2006) A fresh look at an ancient receptor family: emerging roles for low density lipoprotein receptors in synaptic plasticity and memory formation. *Neurobiol Learn Mem* 85: 16–29.
51. Welzl H, Stork O (2003) Cell adhesion molecules: key players in memory consolidation? *News Physiol Sci* 18: 147–150.
52. Benson DL, Schnapp LM, Shapiro L, Huntley GW (2000) Making memories stick: cell-adhesion molecules in synaptic plasticity. *Trends Cell Biol* 10: 473–482.
53. Hishimoto A, Liu QR, Drgon T, Pletnikova O, Walther D, et al. (2007) Neurexin 3 polymorphisms are associated with alcohol dependence and altered expression of specific isoforms. *Hum Mol Genet* 16: 2880–2891.
54. Johnson AD, O'Donnell CJ (2009) An open access database of genome-wide association results. *BMC Med Genet* 10: 6.
55. Smith SS, O'Hara BF, Persico AM, Gorelick DA, Newlin DB, et al. (1992) Genetic vulnerability to drug abuse. The D2 dopamine receptor Taq I B1 restriction fragment length polymorphism appears more frequently in polysubstance abusers. *Arch Gen Psychiatry* 49: 723–727.
56. Persico AM, Bird G, Gabbay FH, Uhl GR (1996) D2 dopamine receptor gene TaqI A1 and B1 restriction fragment length polymorphisms: enhanced frequencies in psychostimulant-preferring polysubstance abusers. *Biol Psychiatry* 40: 776–784.
57. Dupont WD, Plummer WD Jr (1990) Power and sample size calculations. A review and computer program. *Control Clin Trials* 11: 116–128.
58. Dupont WD, Plummer WD Jr (1998) Power and sample size calculations for studies involving linear regression. *Control Clin Trials* 19: 589–601.
