# Supplementary material for: Genome Wide Association for Addiction: Replicated Results and Comparisons of Two Analytic Approaches
Source: PLOS journal article supplement (doi:10.1371/journal.pone.0008832), 2010-01-20
Supplement: S1 (10.1371/journal.pone.0008832.s001) [file journal.pone.0008832.s001]

**Figure S1.**

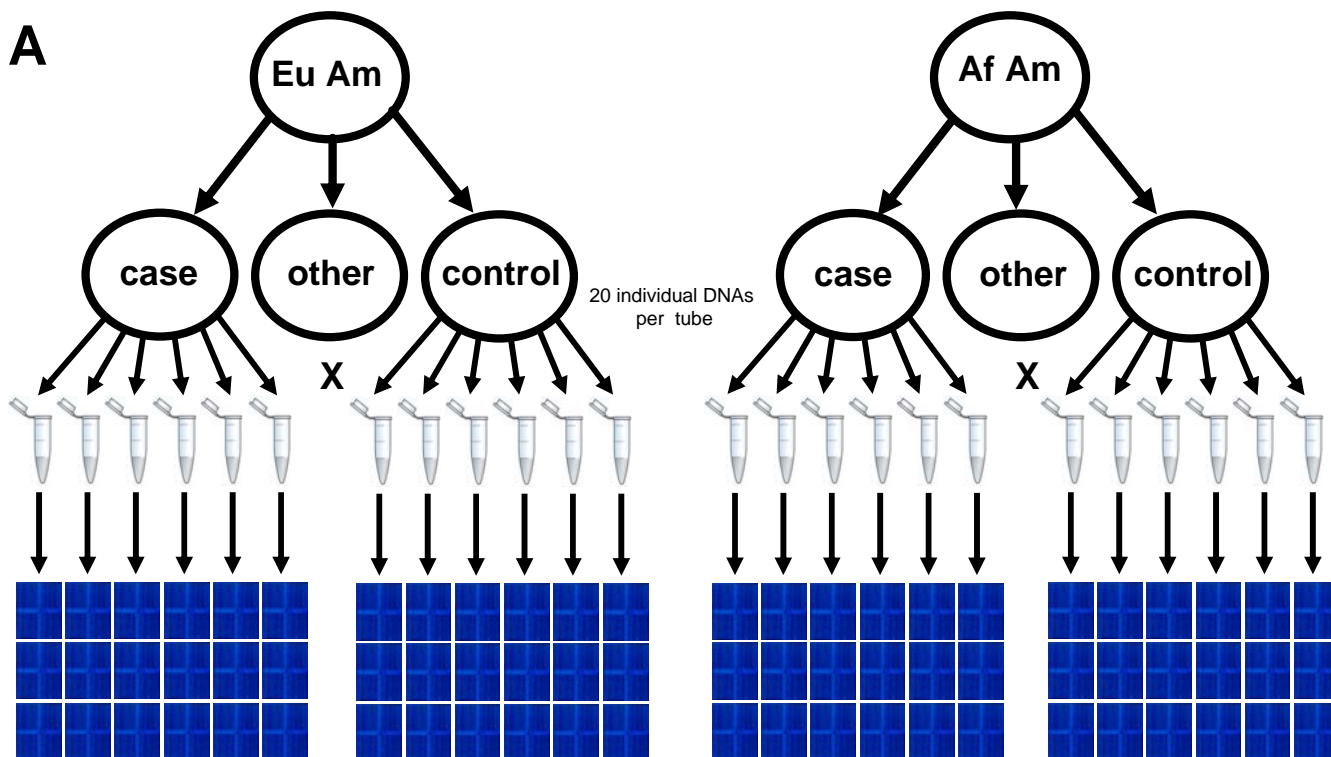

**B**

- 1) Average hybridization for each allele for each SNP for each DNA pool (normalized/background corrected, 3 arrays, 3-4 replicates/array)
- 2) Average arctangent of allele hybridization intensity ratio A/B for each SNP for each DNA pool
- 3) p values (t test) for case vs control differences (each SNP, each sample)

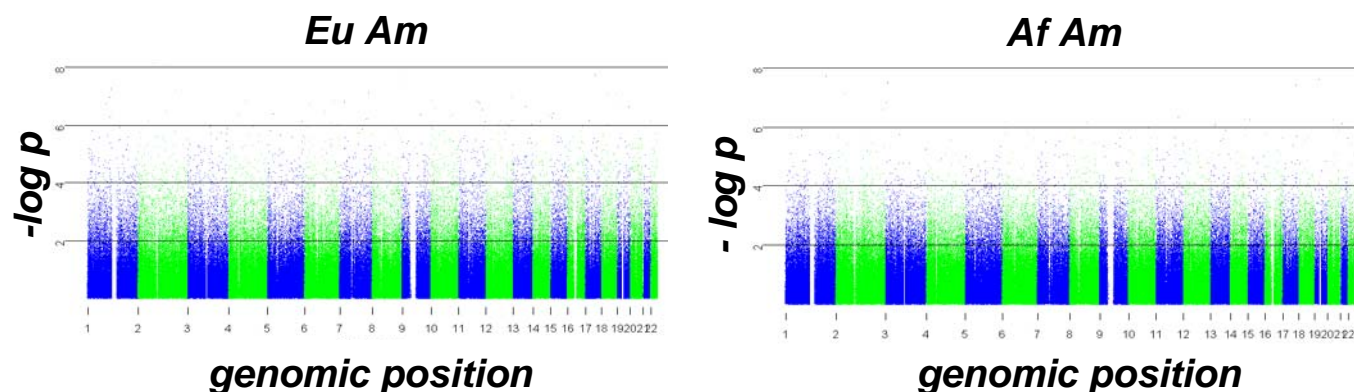

- 4a) Identify chromosomal regions that display “converge then cluster results” (at least 4 SNPs with  $p < 0.05$  in each sample that lie within 10 kb of each other).
- 4b) Identify chromosomal regions that display clustered positive results in each sample (“cluster than converge”).
- 5) List annotated genes within these chromosomal regions.
